# Supplementary material for: Associations of Maternal Urinary Concentrations of Phenols, Individually and as a Mixture, with Serum Biomarkers of Thyroid Function and Autoimmunity: Results from the EARTH Study
Source: MDPI journal article supplement (doi:10.3390/toxics11060521), 2023-06-09
Supplement: s1 [file s1]

**Table S1.** Distribution of urinary concentrations ( $\mu\text{g/L}$ ) of phenol biomarkers among women in the Environment and Reproductive (EARTH) Study.

|                            | Detection<br>Frequency <sup>a</sup> % | Geomean (SE) | 10th | 25th | 50th | 75th | 95th |
|----------------------------|---------------------------------------|--------------|------|------|------|------|------|
| Bisphenol A                | 85                                    | 0.86 (0.06)  | 0.28 | 0.30 | 0.80 | 1.80 | 5.80 |
| Benzophenone-3             | 99                                    | 93.6 (10.6)  | 7.20 | 23.3 | 84.6 | 377  | 3090 |
| Butylparaben <sup>b</sup>  | 57                                    | 0.53 (0.06)  | 0.07 | 0.14 | 0.20 | 2.60 | 24.9 |
| Methylparaben              | 100                                   | 80.2 (7.10)  | 7.80 | 30.4 | 85.7 | 249  | 1080 |
| Propylparaben <sup>b</sup> | 98                                    | 16.5 (1.80)  | 0.80 | 4.30 | 23.1 | 66.8 | 293  |
| Triclosan                  | 79                                    | 11.7 (1.31)  | 1.63 | 1.70 | 7.10 | 47.2 | 488  |

<sup>a</sup>Limits of detection (LOD) ranged from 0.1 to 1.0  $\mu\text{g/L}$ . Note: Data are presented before imputation of concentrations <LOD.

<sup>b</sup>Not considered in further analyses.

**Table S2.** Linear single-exposure model results in EARTH Study. Each column/row pair corresponds to a separate model fit.

|                       | log-bisphenol A |                  | log-benzophenone-3 |                 | log-methylparaben |                 | log-triclosan |                  |
|-----------------------|-----------------|------------------|--------------------|-----------------|-------------------|-----------------|---------------|------------------|
|                       | Est             | 95% CI           | Est                | 95% CI          | Est               | 95% CI          | Est           | 95% CI           |
| <b>TSH</b>            | 0.113           | (0.051, 0.175)   | -0.008             | (-0.039, 0.023) | 0.043             | (0.001, 0.084)  | -0.032        | (-0.058, -0.005) |
| <b>fT<sub>4</sub></b> | -0.141          | (-0.259, -0.023) | -0.047             | (-0.104, 0.011) | 0.143             | (0.066, 0.220)  | -0.013        | (-0.063, 0.036)  |
| <b>TT<sub>4</sub></b> | -2.201          | (-3.330, -1.073) | -0.243             | (-0.803, 0.318) | -0.218            | (-0.97, 0.533)  | 0.095         | (-0.381, 0.571)  |
| <b>fT<sub>3</sub></b> | -0.081          | (-0.113, -0.048) | -0.011             | (-0.027, 0.005) | 0.035             | (0.013, 0.056)  | -0.039        | (-0.052, -0.025) |
| <b>TT<sub>3</sub></b> | -0.062          | (-0.085, -0.039) | 0.005              | (-0.006, 0.017) | 0.010             | (-0.005, 0.026) | -0.011        | (-0.021, -0.001) |
| <b>TgAb</b>           | 1.015           | (0.845, 1.219)   | 0.950              | (0.865, 1.044)  | 1.243             | (1.090, 1.418)  | 0.893         | (0.822, 0.970)   |
| <b>TPOAb</b>          | 1.113           | (0.932, 1.328)   | 0.924              | (0.843, 1.013)  | 1.010             | (0.893, 1.143)  | 0.943         | (0.869, 1.022)   |

Note: Est is estimated association for each 1 unit increase in log concentrations; 95% CI is corresponding confidence interval. For binary outcomes TgAb and TPOAb, coefficients represent odds ratios; all others are mean differences. Models were adjusted for age (years), BMI (kg/m<sup>2</sup>), race (white vs. other), and specific gravity (SG)..

**Table S3.** Linear mixture model results in EARTH Study. Each row corresponds to a single model fit.

|                       | log-bisphenol A |                  | log-benzophenone-3 |                 | log-methylparaben |                 | log-triclosan |                  |
|-----------------------|-----------------|------------------|--------------------|-----------------|-------------------|-----------------|---------------|------------------|
|                       | Est             | 95% CI           | Est                | 95% CI          | Est               | 95% CI          | Est           | 95% CI           |
| <b>TSH</b>            | 0.109           | (-0.013, 0.231)  | -0.016             | (-0.078, 0.046) | 0.043             | (-0.040, 0.125) | -0.030        | (-0.082, 0.023)  |
| <b>fT<sub>4</sub></b> | -0.150          | (-0.382, 0.083)  | -0.060             | (-0.175, 0.055) | 0.166             | (0.012, 0.319)  | -0.015        | (-0.111, 0.081)  |
| <b>TT<sub>4</sub></b> | -2.160          | (-4.400, 0.079)  | -0.134             | (-1.258, 0.990) | -0.080            | (-1.577, 1.417) | 0.069         | (-0.867, 1.005)  |
| <b>fT<sub>3</sub></b> | -0.088          | (-0.151, -0.025) | -0.008             | (-0.040, 0.024) | 0.043             | (0.010, 0.086)  | -0.041        | (-0.067, -0.014) |
| <b>TT<sub>3</sub></b> | -0.066          | (-0.112, -0.020) | 0.008              | (-0.015, 0.032) | 0.012             | (-0.019, 0.043) | -0.013        | (-0.033, 0.006)  |
| <b>TgAb</b>           | 1.004           | (0.697, 1.447)   | 0.943              | (0.781, 1.139)  | 1.265             | (0.975, 1.641)  | 0.892         | (0.757, 1.051)   |
| <b>TPOAb</b>          | 1.123           | (0.793, 1.590)   | 0.919              | (0.764, 1.106)  | 1.027             | (0.806, 1.310)  | 0.949         | (0.808, 1.115)   |

Note: Est is estimated association for each 1 log unit increase in concentrations; 95% CI is corresponding confidence interval. For binary outcomes TgAb and TPOAb, coefficients represent odds ratios; all others are mean differences. Models were adjusted for age (years), BMI (kg/m<sup>2</sup>), race (white vs. other), and specific gravity (SG).

tsh

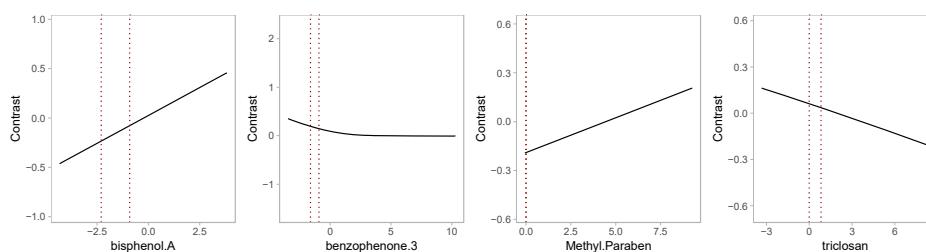

ft4

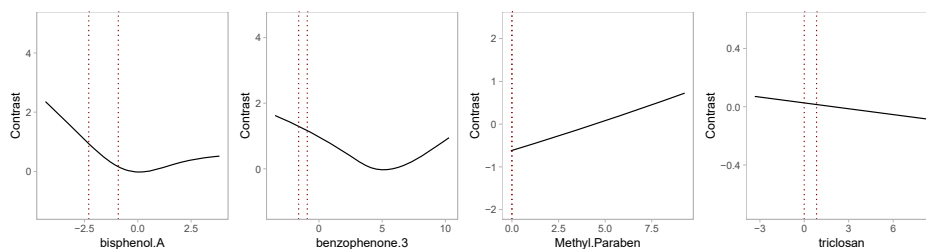

tt4

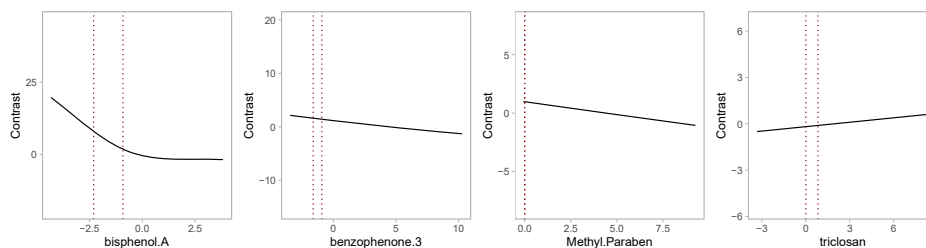

ft3

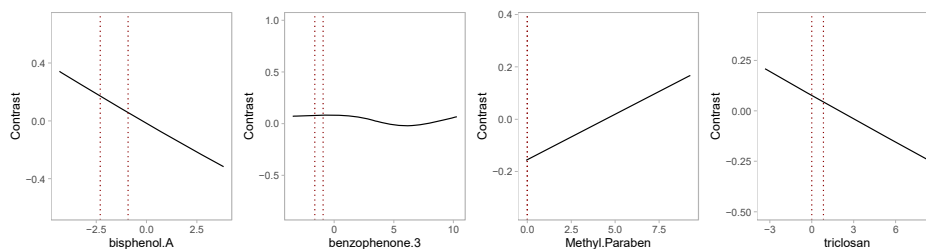

tt3

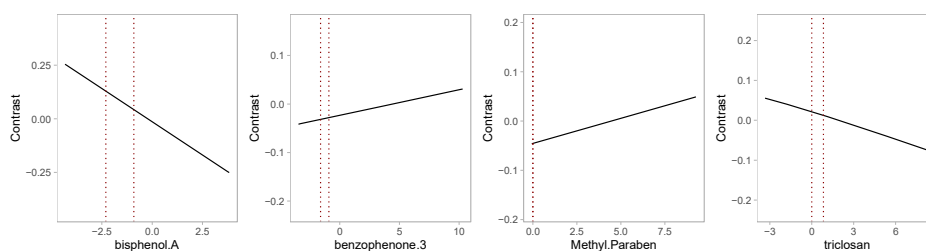

**Figure S1.** Single-component analysis: additive model results for continuous outcomes. Curves are estimated mean differences and corresponding 95% confidence intervals, compared to median log concentration. X-axis indicates log concentration. Each plot corresponds to an individual model. Models were adjusted for age (years), BMI (kg/m<sup>2</sup>), race (white vs. other), and specific gravity (SG).

tgab

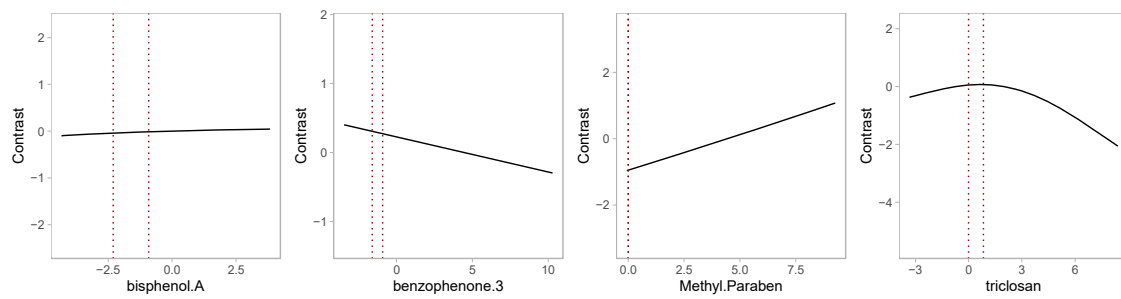

tpo

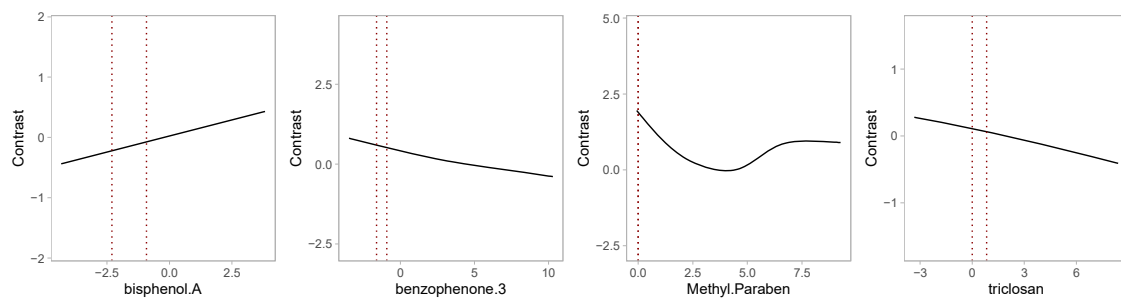

**Figure S2.** Single-component analysis: generalized additive model results for binary outcomes. Curves are estimated log odds ratios and corresponding 95% confidence intervals, compared to median log concentration. X-axis indicates log concentration. Each plot corresponds to an individual model. Models were adjusted for age (years), BMI (kg/m<sup>2</sup>), race (white vs. other), and specific gravity (SG).

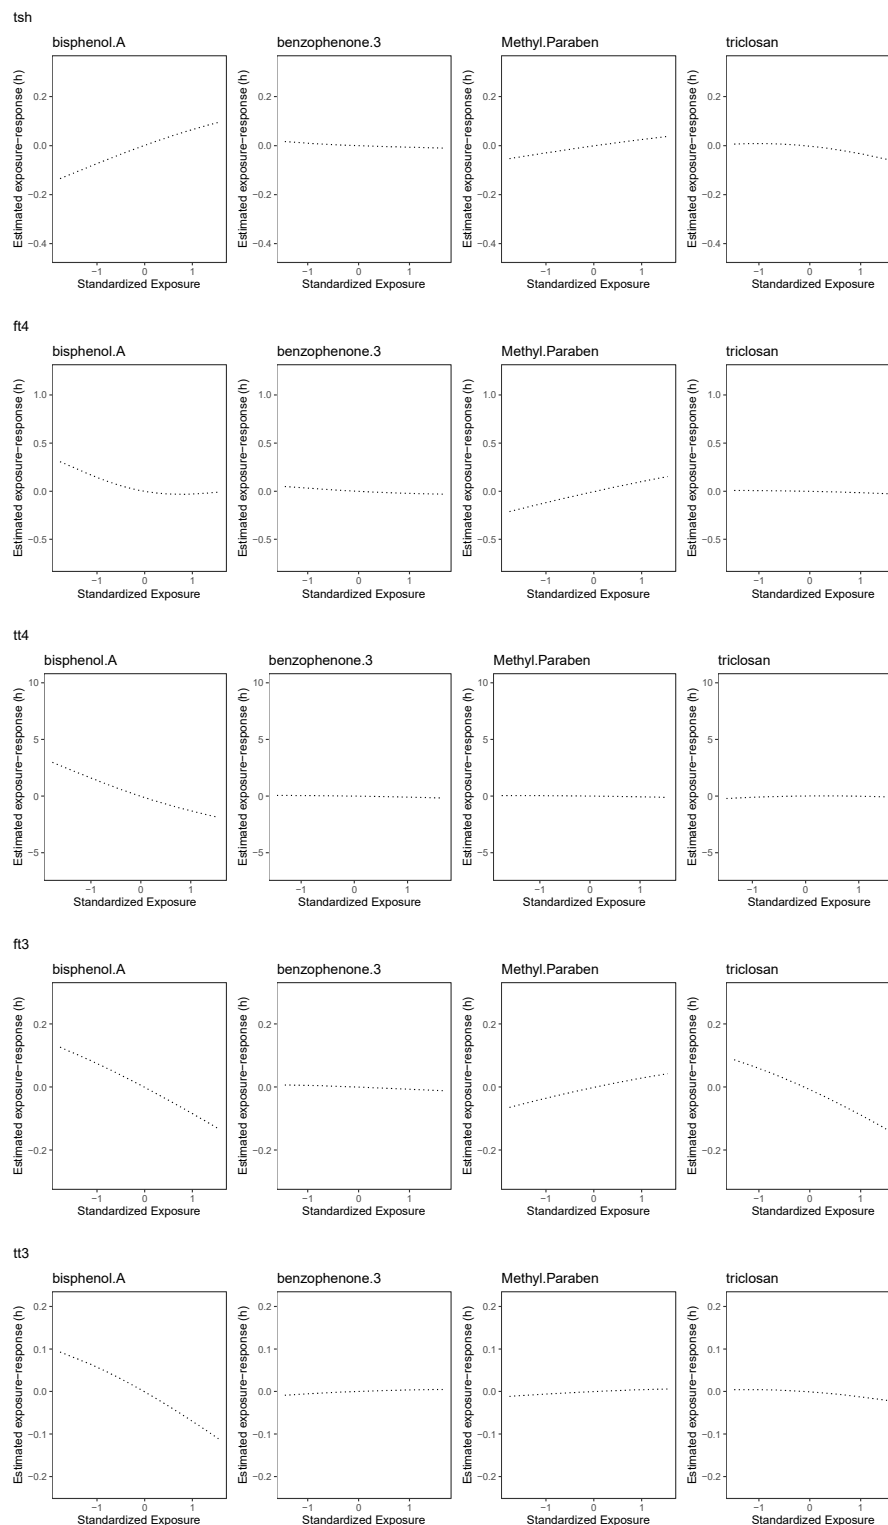

**Figure S3.** Mixture analysis: BKMR results for continuous outcomes. Curves are estimated mean differences and corresponding 95% credible intervals. Each row corresponds to a different model. Models were adjusted for age (years), BMI (kg/m<sup>2</sup>), race (white vs. other), and specific gravity (SG).

(a)

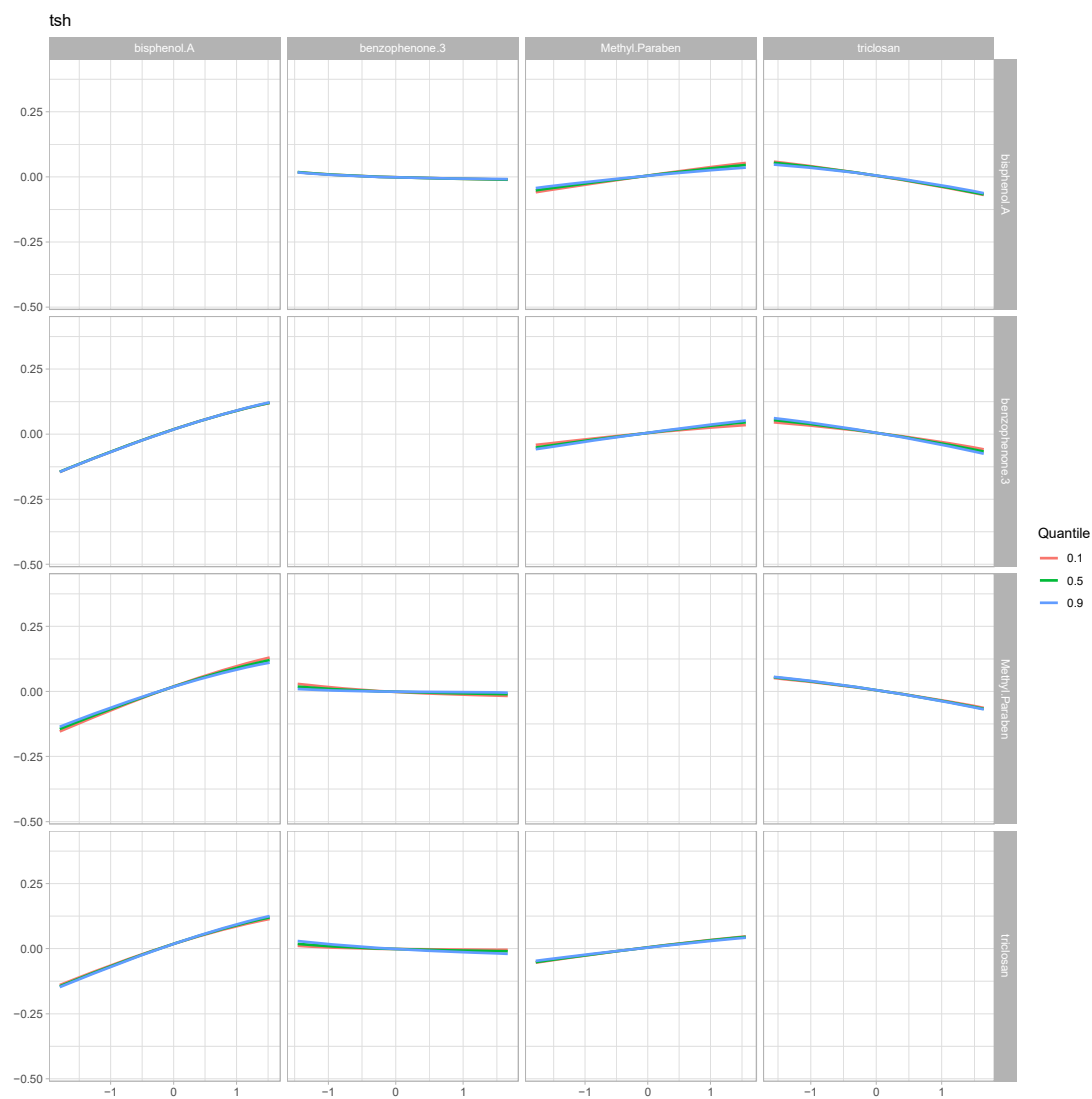

(b)

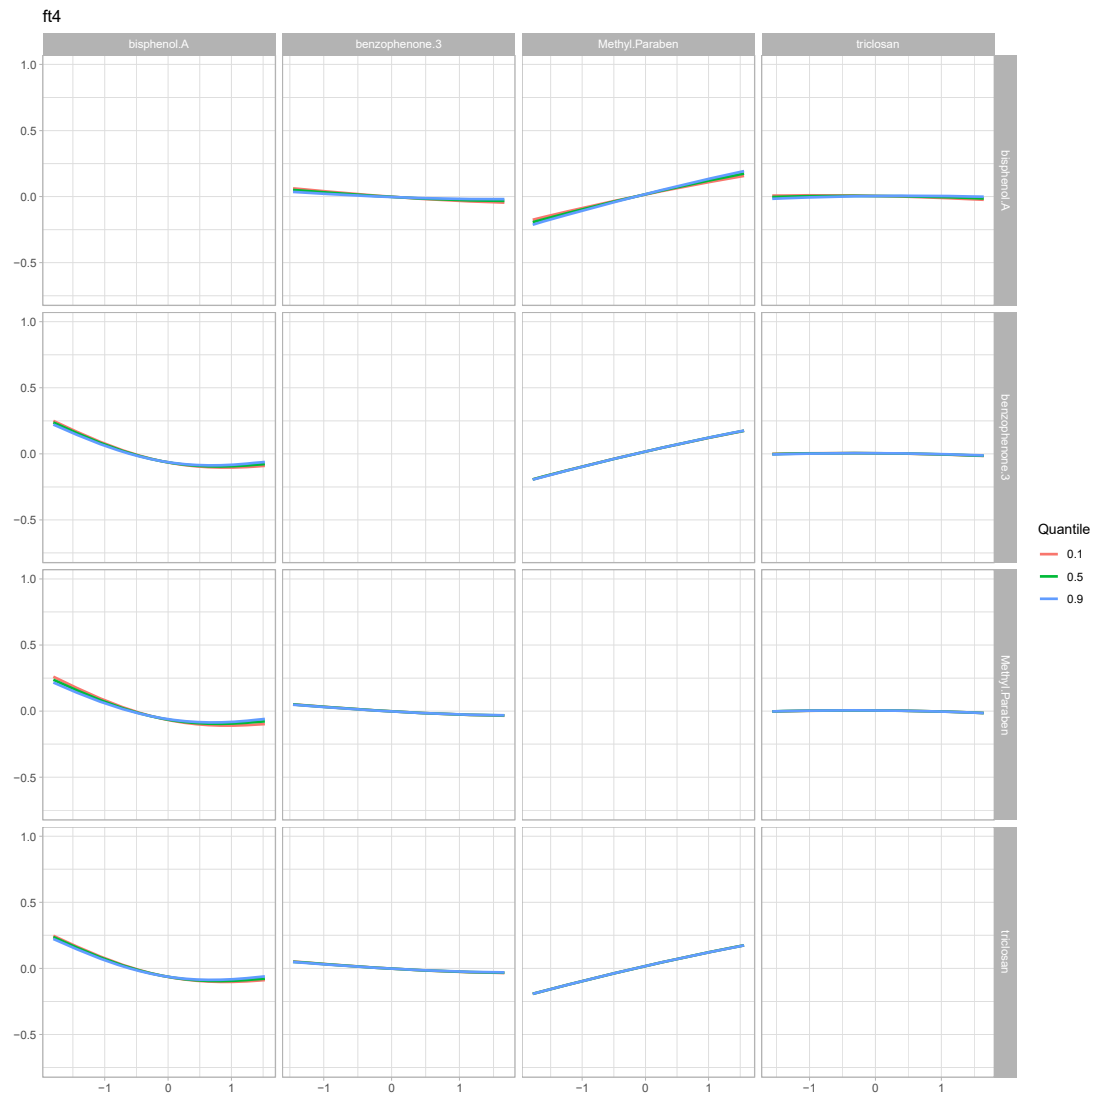

(c)

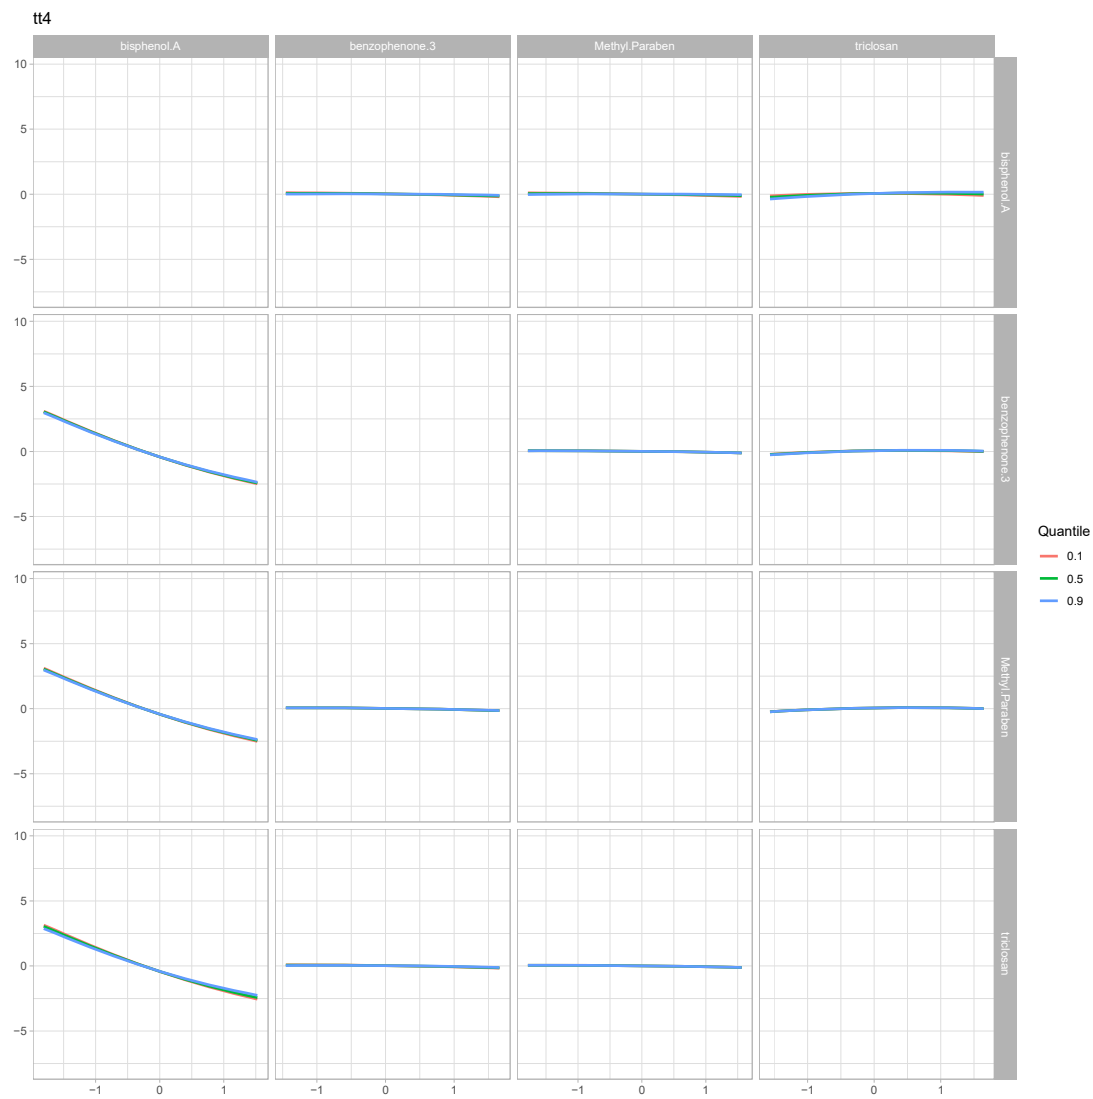

(d)

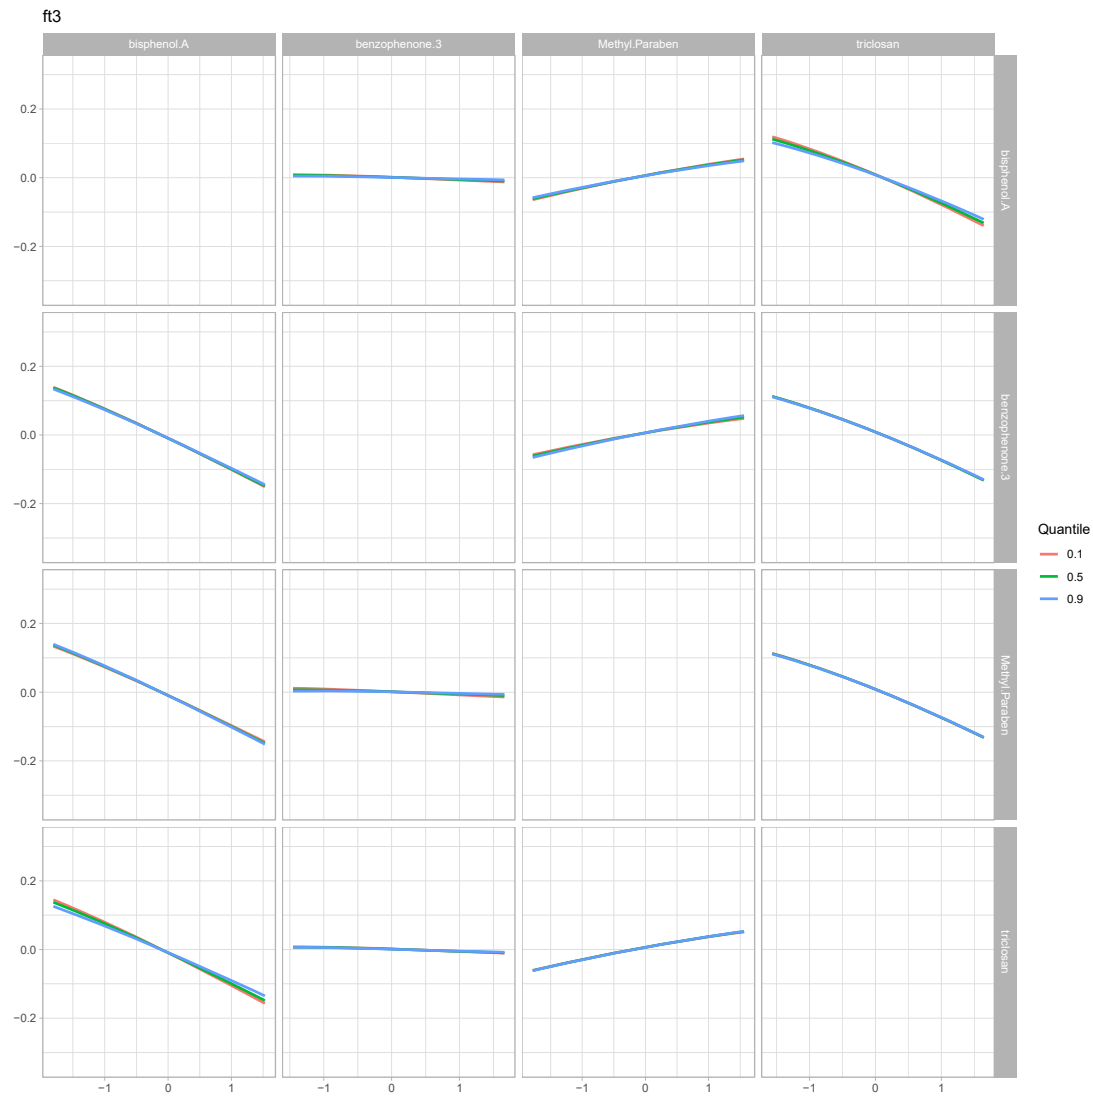



(e)

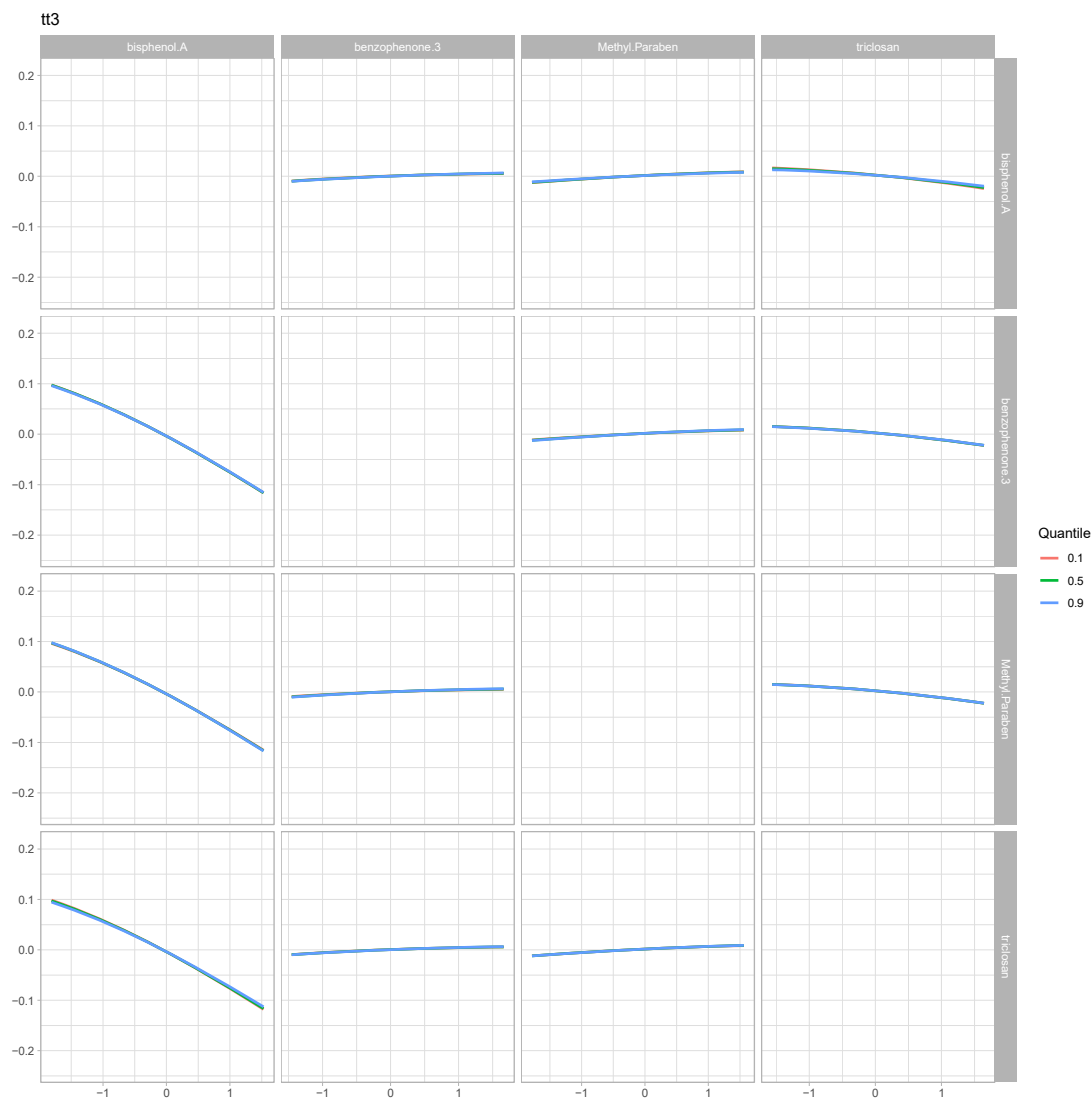

**Figure S4.** Mixture analysis: pairwise interaction plots for in the BKMR analyses for (a) TSH, (b)  $fT_4$ , (c)  $fT_3$ , (d)  $TT_4$  and (e)  $TT_3$ . Curves are estimated mean differences and corresponding 95% credible intervals, holding y-axis component at 10<sup>th</sup>, 50<sup>th</sup> or 90<sup>th</sup> percentile, and other components set to their median. Models were adjusted for age (years), BMI (kg/m<sup>2</sup>), race (white vs. other), and specific gravity (SG).
